# Supplementary material for: Introduction and feeding practices of solid food in preterm infants born in Salzburg!
Source: Springer Nature journal article supplement (doi:10.1186/s12887-021-02505-6), 2021-01-26
Supplement: MOESM1 [file 18804478]

### **Peripartal information**

mother's age at birth ..... gravidity / parity ..... / .....

BMI (at beginning of pregnancy) ..... weight gain during pregnancy in kg .....

relevant previous illness (e.g. Diabetes mellitus, metabolic disease, ...)

.....

illness during pregnancy (e.g. pregnancy related diabetes)

.....

special diet of the mother before / during pregnancy:

before:  none  vegetarian / vegan  other: .....

during:  none  vegetarian / vegan  other: .....

marital status:  single  in a partnership

children < 18 years old living in the same household: .....

the highest educational attainment: .....

profession: .....

nationality: mother: ..... father: .....

native language: mother: ..... father: .....

average annual family income (net)

< 30.000 €  30.000-60.000 €  > 60.000 €

### **Perinatal information**

gestational age: ..... (weeks) / ..... (days)

weight at birth: ..... g length at birth: ..... cm head circumference at birth: ..... cm

sex:  female  male pregnancy:  single  twin  triplet

mode of delivery:  vaginal delivery  caesarean section  vacuum  other

APGAR 1 / 5 / 10 min. .... / .... / ..... cord arterial blood pH: .....

relevant medical problems during birth: .....
