# Supplementary material for: Introduction and feeding practices of solid food in preterm infants born in Salzburg!
Source: Springer Nature journal article supplement (doi:10.1186/s12887-021-02505-6), 2021-01-26
Supplement: MOESM2 [file 18804478]

**Indicate the actual body measurements of your child.**

weight: ..... g height: ..... cm head circumference: ..... cm  
percentile (WHO): weight: ..... height: ..... head circumference: .....

**Has / had your child any health problems? If yes, what kind of and when?**

.....

**Do / did you breastfeed your child or do / did you offer breast milk?**

Yes:  breastfeed  breast milk  donor human milk

at the moment:  exclusively breastfeeding  partial breastfeeding

supplementary food  formula

before:  exclusively breastfeeding until ..... weeks of age

partial breastfeeding until ..... weeks of age

No, I never breastfeed / give breast milk

**Did your child ever receive fortification of breast milk (e.g. FMS / FM 85)?**

No  Yes:  until calculated date of birth  until corrected 12 weeks of age  other

**Did your child ever receive formulae for premature infants. (e.g. Aptamil PDF / Beba FG 1 or 2)?**

No  Yes:  until calculated date of birth  until corrected 12 weeks of age  other

**What kind of formulae did your child receive?**

None  PRE until ..... weeks of age

formulae for premature infants step 1 until ..... weeks of age

formulae for premature infants step 2 until ..... weeks of age

Formula 1 until ..... weeks of age  Formula 2 until ..... weeks of age

other: .....

**Have you started with supplementary food yet?**

- No     Yes, since ..... weeks of age (corrected age ..... in weeks)

**When did you start the following foods?**

- |                                |                                             |                                |
|--------------------------------|---------------------------------------------|--------------------------------|
| vegetable gruel                | <input type="checkbox"/> ..... weeks of age | <input type="checkbox"/> never |
| vegetable/grain                | <input type="checkbox"/> ..... weeks of age | <input type="checkbox"/> never |
| meaty food                     | <input type="checkbox"/> ..... weeks of age | <input type="checkbox"/> never |
| grain porridge (without milk)  | <input type="checkbox"/> ..... weeks of age | <input type="checkbox"/> never |
| grain porridge (with milk)     | <input type="checkbox"/> ..... weeks of age | <input type="checkbox"/> never |
| fruit-based mash               | <input type="checkbox"/> ..... weeks of age | <input type="checkbox"/> never |
| water / tea (sugarfree)        | <input type="checkbox"/> ..... weeks of age | <input type="checkbox"/> never |
| tea (with sugar)               | <input type="checkbox"/> ..... weeks of age | <input type="checkbox"/> never |
| fruit juice / sweetened drinks | <input type="checkbox"/> ..... weeks of age | <input type="checkbox"/> never |
| other (eggs, fisch)            | <input type="checkbox"/> ..... weeks of age | <input type="checkbox"/> never |

**How often do you start a new sort of food?**

- every day     every 2-3 days     every 4-5 days     once a week or less

**Does your child receive a special diet at the moment e.g. vegetarian? If yes, what?**

.....

**Why did you start with supplementary food?**

- my child didn't have enough / was still hungry
- my child was interested in / ready for food
- my pediatrician recommended me to start with
- other: .....

**How did you get information about supplementary food?**

- |                                                         |                                              |
|---------------------------------------------------------|----------------------------------------------|
| <input type="checkbox"/> conversation with pediatrician | <input type="checkbox"/> information booklet |
| <input type="checkbox"/> books: .....                   | <input type="checkbox"/> „Baby led weaning“  |
| <input type="checkbox"/> internet                       | <input type="checkbox"/> other: .....        |

**Does your child get at the moment ...**

- |                                   |                              |                             |
|-----------------------------------|------------------------------|-----------------------------|
| <b>... supplemental iron:</b>     | <input type="checkbox"/> yes | <input type="checkbox"/> no |
| <b>... supplemental vitamins:</b> | <input type="checkbox"/> yes | <input type="checkbox"/> no |
